# Supplementary material
Source: PubMed Central journal article supplement (PMC8292992)
Supplement: MD-012-D1MD00073J-s001.pdf [file MD-012-D1MD00073J-s001.pdf]

Electronic Supplementary Material (ESI) for  
**Human Carboxylesterases and Fluorescent Probes to Image Their Activity in Live Cells**  
Anchal Singh,<sup>a</sup> Mingze Gao,<sup>b</sup> and Michael W. Beck<sup>\*a</sup>

<sup>a</sup>Department of Chemistry and Biochemistry, Eastern Illinois University, Charleston, IL 61920, USA; Email: [MBeck2@eiu.edu](mailto:MBeck2@eiu.edu);  
Tel: +1-217-581-6227

<sup>b</sup>Department of Biological Sciences, Eastern Illinois University, Charleston, IL 61920, USA

**Supplementary Table 1.** Fluorescent probes reported to be specific for CESs in live cells.

| Structure                                                                           | Name      | Type    | Year | Reference      |
|-------------------------------------------------------------------------------------|-----------|---------|------|----------------|
| 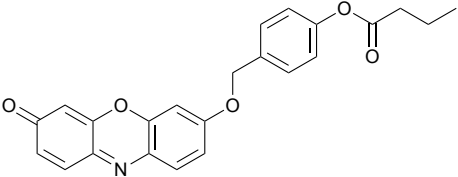   | "Probe 1" | Turn-On | 2011 | <sup>1,2</sup> |
|    | "1"       | Turn-On | 2012 | <sup>3</sup>   |
|   | "2"       | Turn-On | 2014 | <sup>2</sup>   |
|  | "3"       | Turn-On | 2014 | <sup>2</sup>   |
|  | "4"       | Turn-On | 2014 | <sup>2</sup>   |

|                                                                                     |          |             |      |   |
|-------------------------------------------------------------------------------------|----------|-------------|------|---|
| 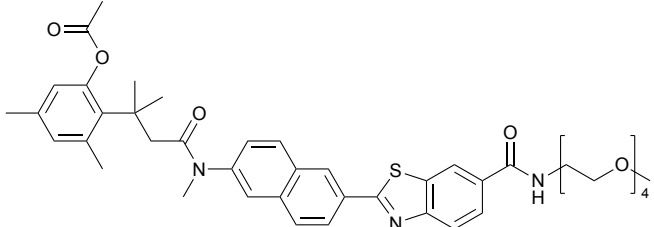   | SE1      | Turn-On     | 2016 | 4 |
|    | Ir-TB    | Ratiometric | 2016 | 4 |
|    | "1"      | Turn-On     | 2017 | 5 |
|   | "1"      | Turn-On     | 2017 | 6 |
|  | HCyNac   | Turn-On     | 2018 | 7 |
|  | "1"      | Turn-On     | 2019 | 8 |
|  | Lyso-CEs | Turn-On     | 2019 | 9 |

|                                                                                     |         |             |      |    |
|-------------------------------------------------------------------------------------|---------|-------------|------|----|
| 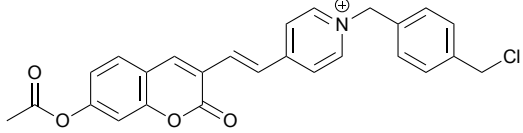   | CEMT    | Ratiometric | 2019 | 10 |
|    | Benz-AP | Ratiometric | 2019 | 11 |
|    | OMBT    | Turn-On     | 2019 | 12 |
|   | MPBOD   | Turn-Off    | 2020 | 13 |
|  | CBZ-BOD | Turn-Off    | 2021 | 14 |

#### References

- 1 W. Hakamata, A. MacHida, T. Oku and T. Nishio, *Bioorganic Med. Chem. Lett.*, 2011, **21**, 3206.
- 2 W. Hakamata, S. Tamura, T. Hirano and T. Nishio, *ACS Med. Chem. Lett.*, 2014, **5**, 321.
- 3 Y. Zhang, W. Chen, D. Feng, W. Shi, X. Li and H. Ma, *Analyst*, 2012, **137**, 716.
- 4 S. J. Park, H. W. Lee, H. R. Kim, C. Kang and H. M. Kim, *Chem. Sci.*, 2016, **7**, 3703.
- 5 E. A. Halabi, Z. Thiel, N. Trapp, D. Pinotsi and P. Rivera-Fuentes, *J. Am. Chem. Soc.*, 2017, **139**, 13200.

- 6 D. Li, Z. Li, W. Chen and X. Yang, *J. Agric. Food Chem.*, 2017, **65**, 4209.
- 7 J. Wang, Q. Chen, N. Tian, W. Zhu, H. Zou, X. Wang, X. Li, X. Fan, G. Jiang and B. Z. Tang, *J. Mater. Chem. B*, 2018, **6**, 1595.
- 8 M. Li, C. Zhai, S. Wang, W. Huang, Y. Liu and Z. Li, *RSC Adv.*, 2019, **9**, 40689.
- 9 H. Zhou, J. Tang, J. Zhang, B. Chen, J. Kan, W. Zhang, J. Zhou and H. Ma, *J. Mater. Chem. B*, 2019, **7**, 2989.
- 10 A. Jiang, G. Chen, J. Xu, Y. Liu, G. Zhao, Z. Liu, T. Chen, Y. Li and T. D. James, *Chem. Commun.*, 2019, **55**, 11358.
- 11 K. Kailass, O. Sadovski, M. Capello, Y. Kang, J. B. Fleming, S. M. Hanash and A. A. Beharry, *Chem. Sci.*, 2019, **10**, 8428.
- 12 Z. Liu, H. Du, T. Wang, Y. Ma, J. Liu, M. Yan and H. Wang, *Dye. Pigment.*, 2019, **171**, 107711.
- 13 C. Ma, J. Wu, W. Sun, Y. Hou, G. Zhong, R. Gao, B. Shen and H. Huang, *Sensors Actuators B Chem.*, 2020, **325**, 128798.
- 14 B. Shen, C. Ma, Y. Ji, J. Dai, B. Li, X. Zhang and H. Huang, *ACS Appl. Mater. Interfaces*, 2021, **13**, 8718.
